# Supplementary material for: Phase transition behaviour in yeast and bacterial populations under stress
Source: R Soc Open Sci. 2020 Jul 22;7(7):192211. doi: 10.1098/rsos.192211 (PMC7428260; doi:10.1098/rsos.192211)
Supplement: Supplementary Data Table 1 [file rsos192211supp1.xlsx]

## Sheet: Sheet1
			Supplementary Table 1
			Number of Doublings (Salt)
	Days After Inoculation
[NaCl], N	1	2	3	4	5	6	7	8
57 g/l	2.7441	2.4988	2.8655	4.5762	4.789	4.9312	4.8879	5.0788	Mean
N=4	1.08194	0.238958	0.642909	0.139887	0.665999	0.341763	0.778216	0.530518	STD
66.5 g/l	1.5731	1.8912	2.1597	3.3422	3.5594	4.4604	4.8659	5.1149	Mean
N=3	1.12447	0.0589632	0.795238	0.957316	1.06881	0.409002	0.679514	0.37899	STD
71.25 g/l	0.8078	1.6048	1.706	2.0855	2.4828	4.3204	4.5892	4.4603	Mean
N=3	0.170914	0.102869	0.237971	0.171087	2.25976	0.0453186	0.117373	0.2037	STD
76 g/l	0.345	1.1504	1.3644	1.5139	2.3342	3.0643	3.6737	3.8863	Mean
N=4	0.116986	0.332573	0.0938244	0.205855	0.79329	1.28244	0.592475	0.442494	STD
80.75 g/l	0.3053	0.7481	1.2007	1.0533	1.7234	3.1131	3.5412	3.474	Mean
N=4	0.154294	0.677465	0.128621	0.277797	0.452193	0.577231	0.251207	0.176935	STD
85.5 g/l	-0.0679	0.4523	0.7177	1.1549	1.1905	1.6152	2.3817	2.7604	Mean
N=4	0.397824	0.318456	0.403734	0.345208	0.105127	0.678491	1.00393	0.886302	STD
90.25 g/l	-0.1741	-0.0396	0.4194	0.9497	0.9059	1.1947	1.6646	2.314	Mean
N=3	0.0685388	0.1005	0.0820514	0.22579	0.211361	0.50729	0.569142	0.33553	STD
95 g/l	-0.2945	0.058	-0.3422	0.2949	0.0365	0.4835	0.6646	1.0983	Mean
N=4	0.195614	0.383755	0.282908	0.40643	0.333907	0.140241	0.256884	0.49784	STD
99.75 g/l	-0.4876	-0.0126	0.0584	0.2307	0.4207	0.568	0.769	0.997	Mean
N=3	-0.487619	-0.0126396	0.0583622	0.230653	0.420695	0.568028	0.768984	0.997029	STD
104.5 g/l	-0.1164	-0.3265	-0.1787	0.1285	-0.0154	0.1854	-0.027	-0.0924	Mean
N=4	0.0880089	0.192944	0.161775	0.13992	0.13181	0.469301	0.0616284	0.177576	STD
